# Supplementary material
Source: PubMed Central journal article supplement (PMC1459239)

# Figure S2

A

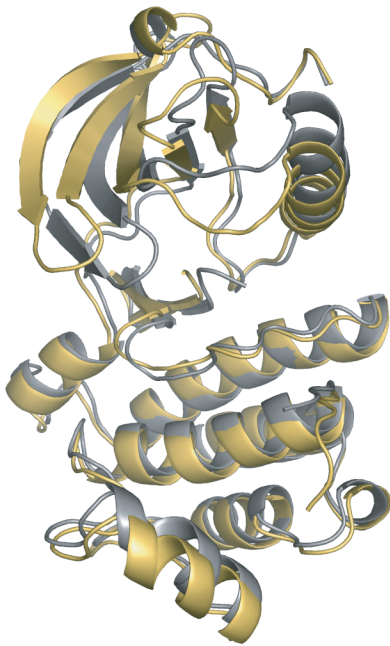

● Abl simulation (200 ps)

● Abl Molecule B

B From top to bottom: restraint force vs. time, r.m.s. deviation vs. time for two simulations (force constant  $K=10.5 \text{ pN/\AA}$ ).

i) No DFG flip occurs

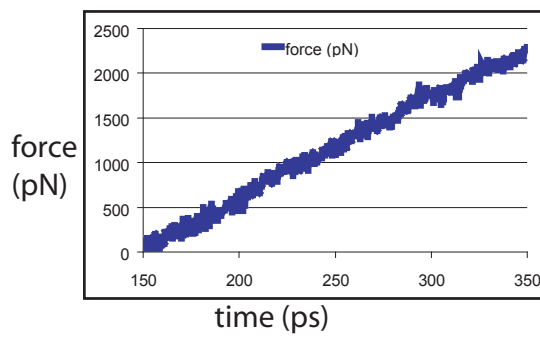

ii) Partial DFG flip occurs

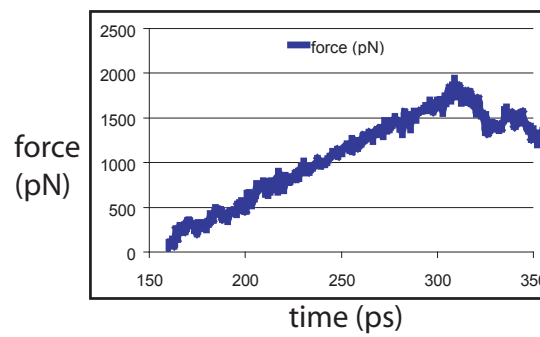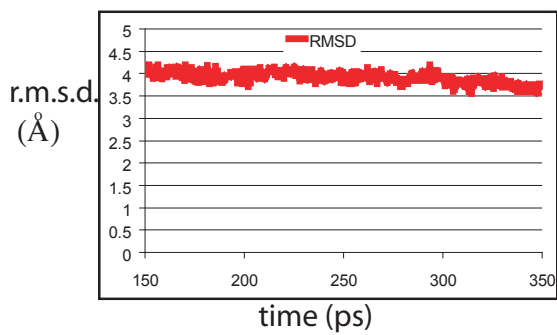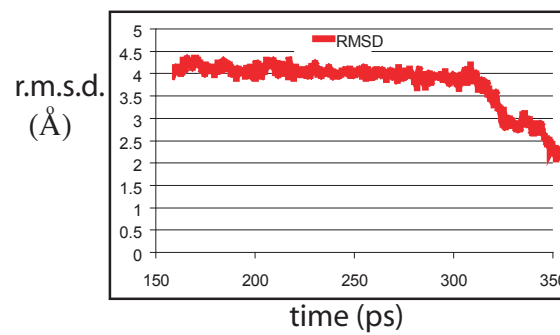

Supplement: pbio.0040144.sg002.pdf [file pbio.0040144.sg002.pdf]
