# Supplementary material
Source: PubMed Central journal article supplement (PMC1459239)

# Figure S1

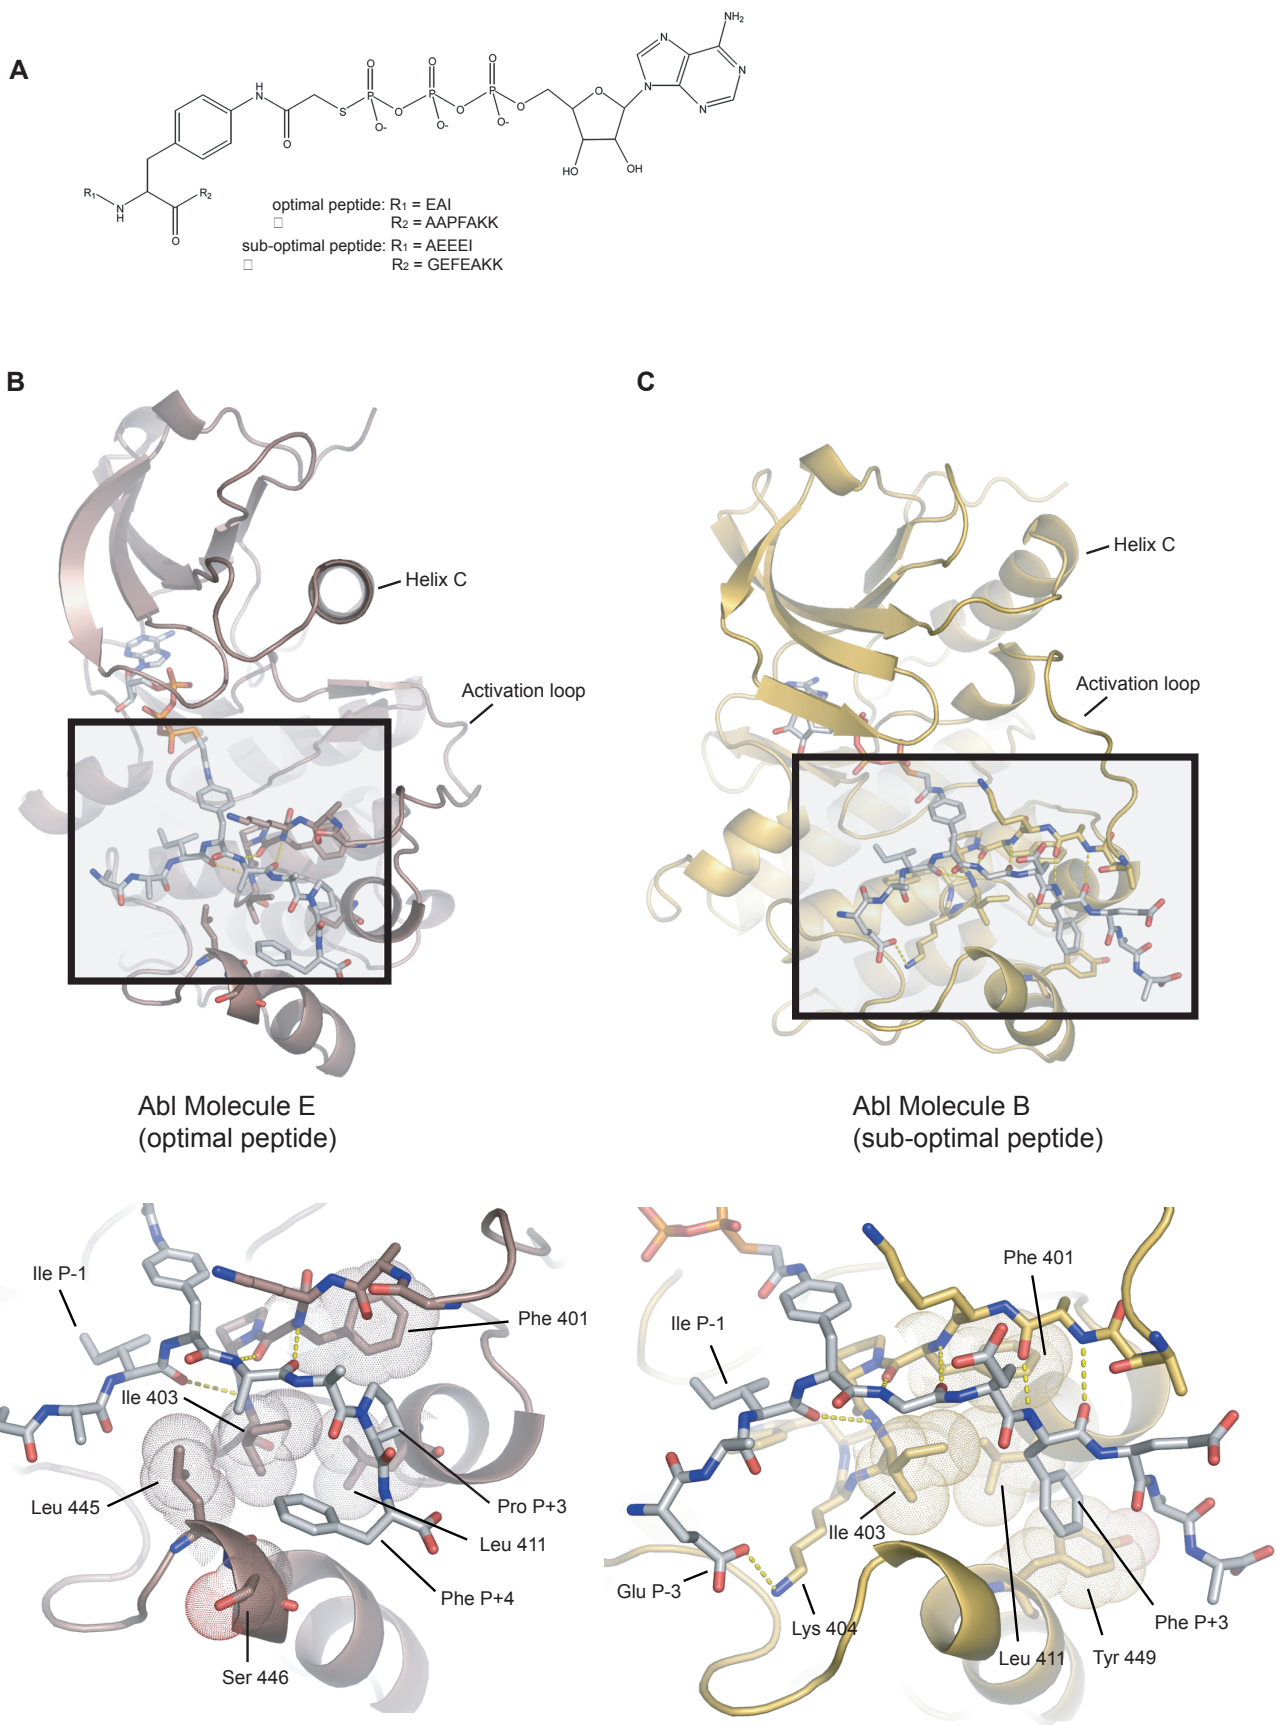

Supplement: pbio.0040144.sg001.pdf [file pbio.0040144.sg001.pdf]

# Figure S3

**A**

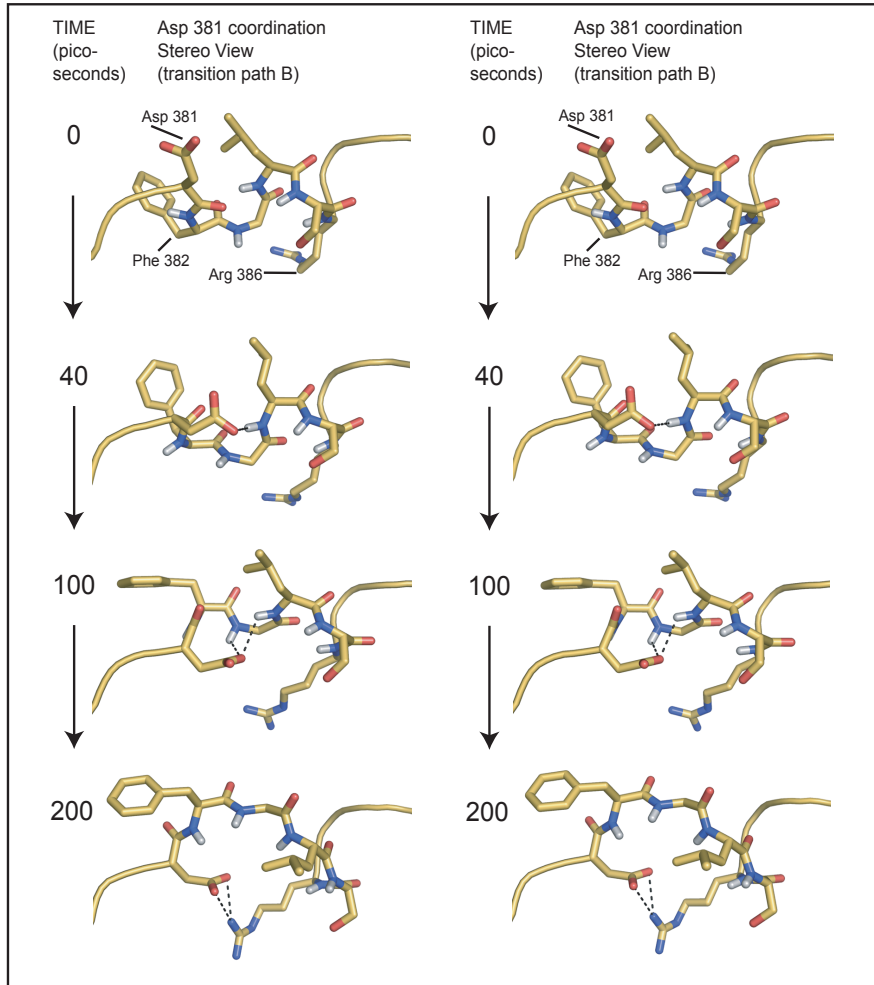

**B**

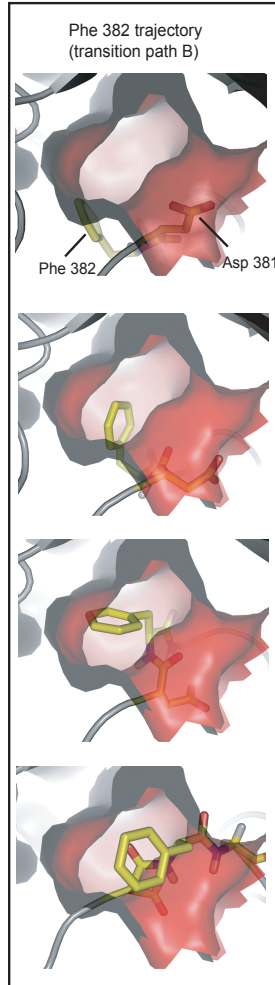

**C**

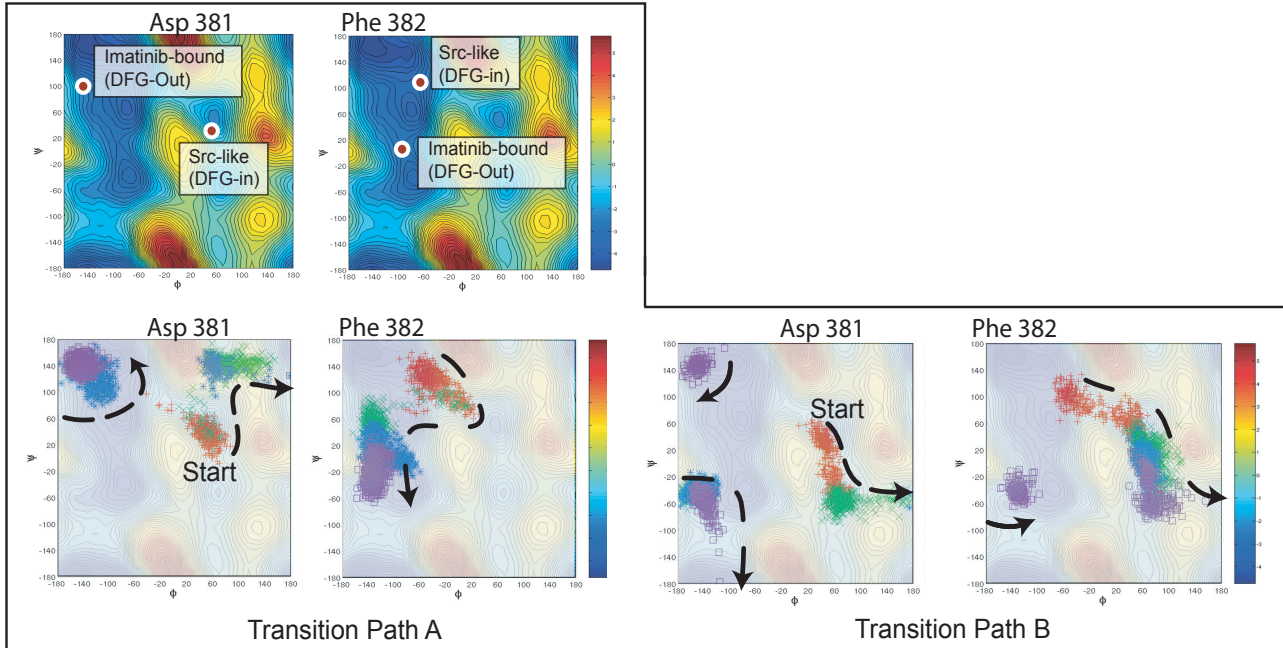

Supplement: pbio.0040144.sg003.pdf [file pbio.0040144.sg003.pdf]

# Figure S4

● Active Abl

● Abl:Imatinib Complex

● Abl Src-like Inactive (Molecule B)

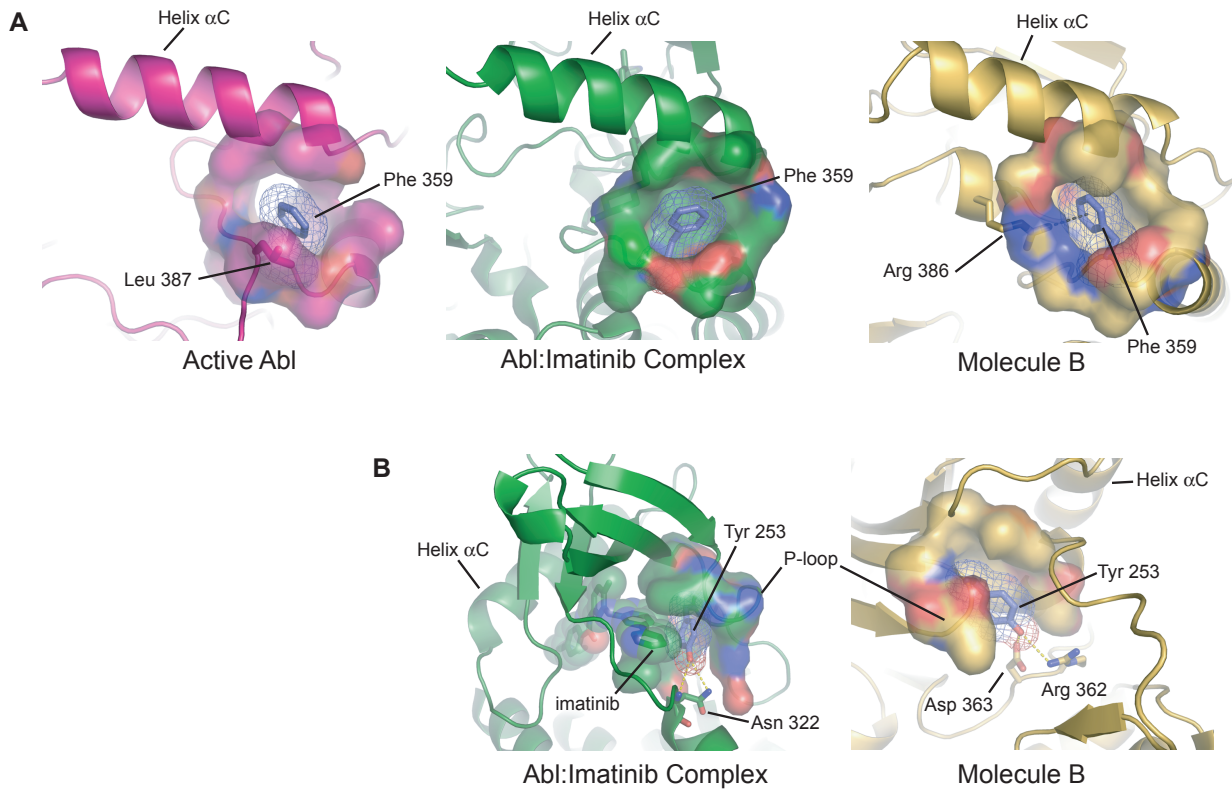

Supplement: pbio.0040144.sg004.pdf [file pbio.0040144.sg004.pdf]
